# Supplementary material for: A Past Genetic Bottleneck from Argentine Beans and a Selective Sweep Led to the Race Chile of the Common Bean (Phaseolus vulgaris L.)
Source: MDPI journal article supplement (doi:10.3390/ijms25074081), 2024-04-06

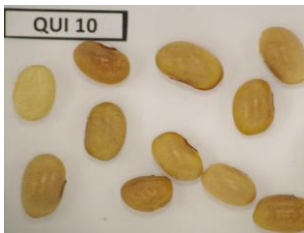

“Burro Argentino”

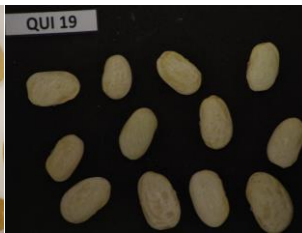

“Coscorron Corriente”

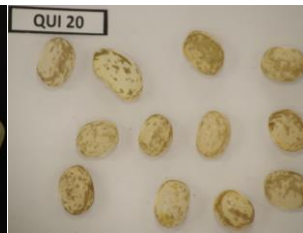

“Hallado”

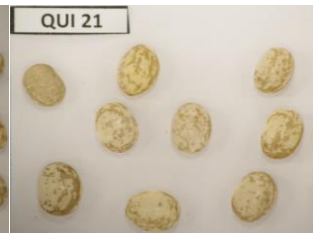

“Hallado Chico”

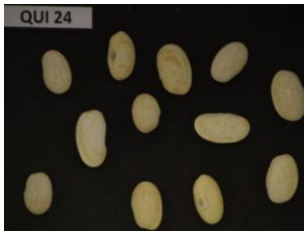

“Coscorron Mendez 1”

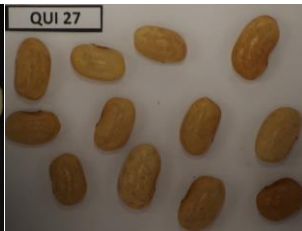

“Bayas”

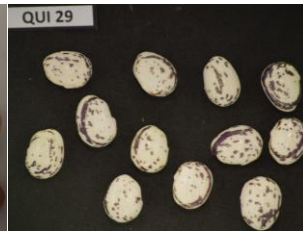

“Sapito”

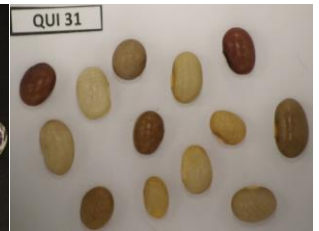

“Burro”

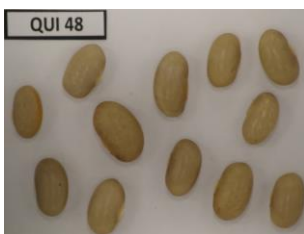

“Tortola Corriente”

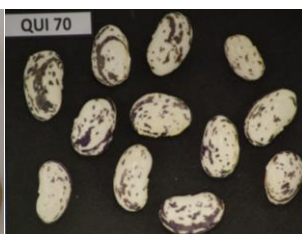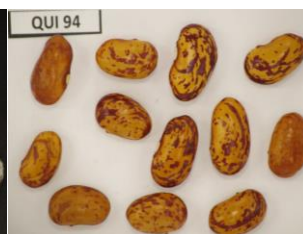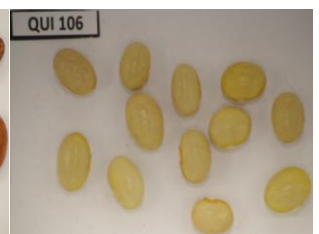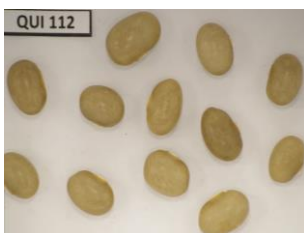

“Tortola”

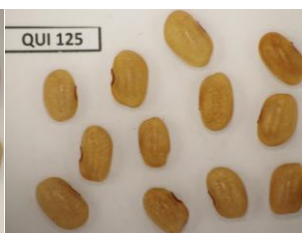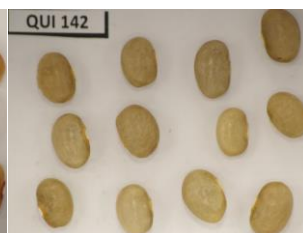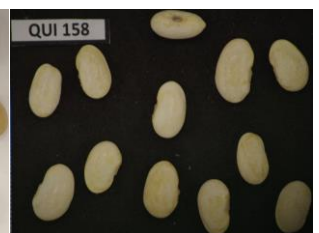

“Coscorron”

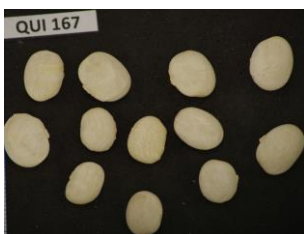

“Pajarito”

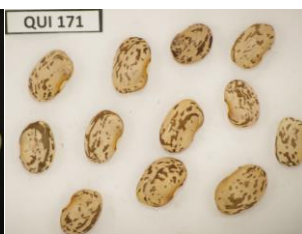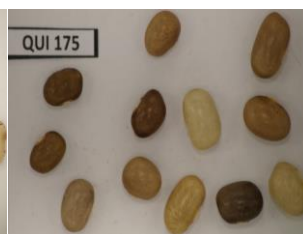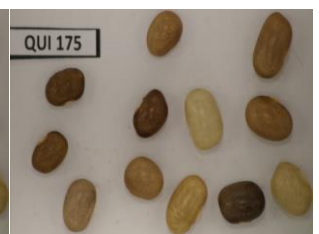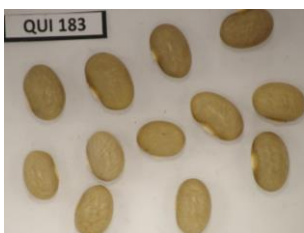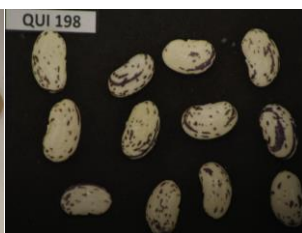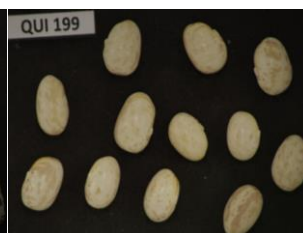

“Coscorron”

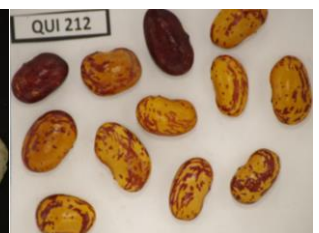

“Bio-Bio”

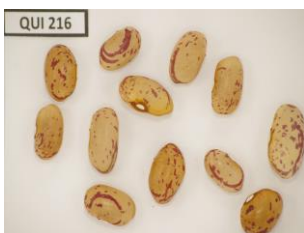

“Frutilla”

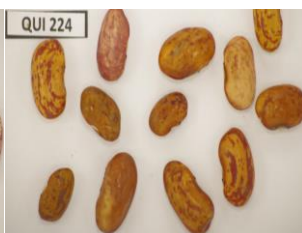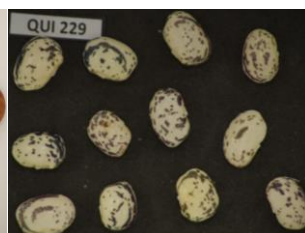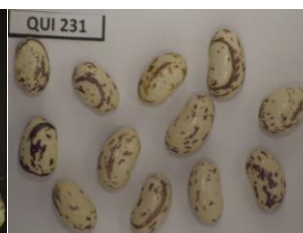

“Sapito”

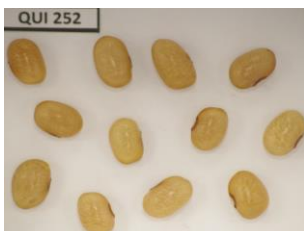

“Burro Argentino”

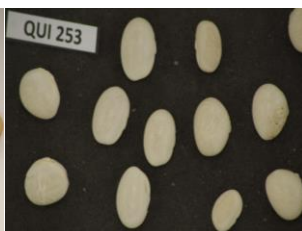

“Mantequilla”

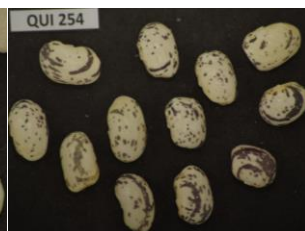

“Pajarito”

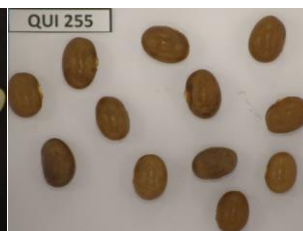

“Burro Chileno”

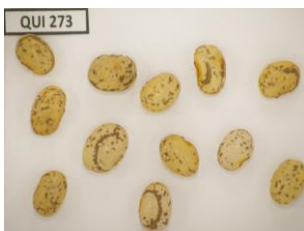

“Diuca”

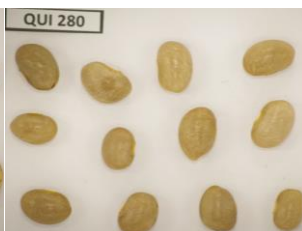

“Burrito Argentino”

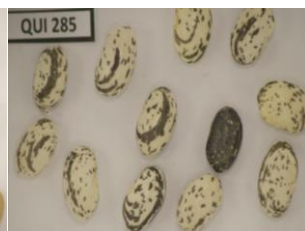

“Hallado Chileno”

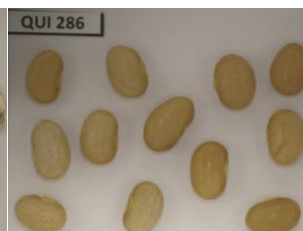

“Tortola Corriente”

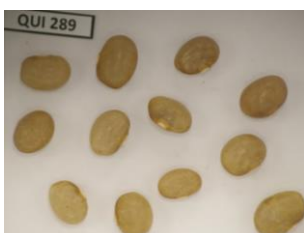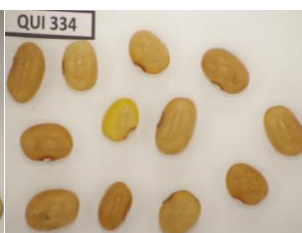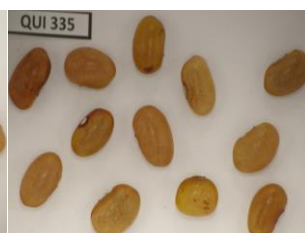

“Siete Semanas”

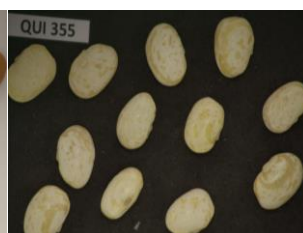

“Coscorron”

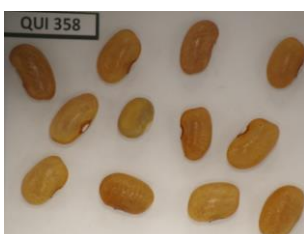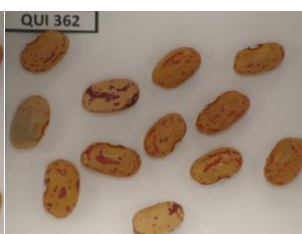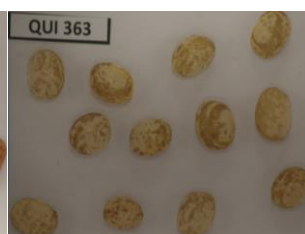

“Hallado Chico”

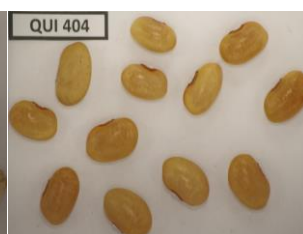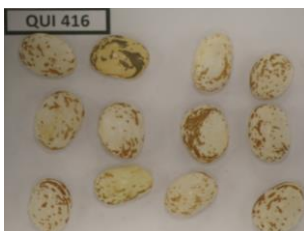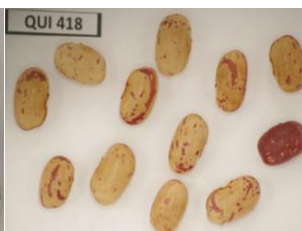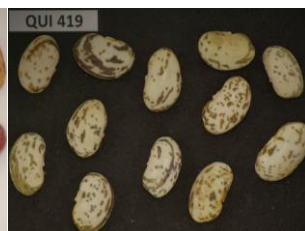

“Peumo”

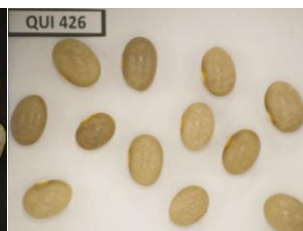



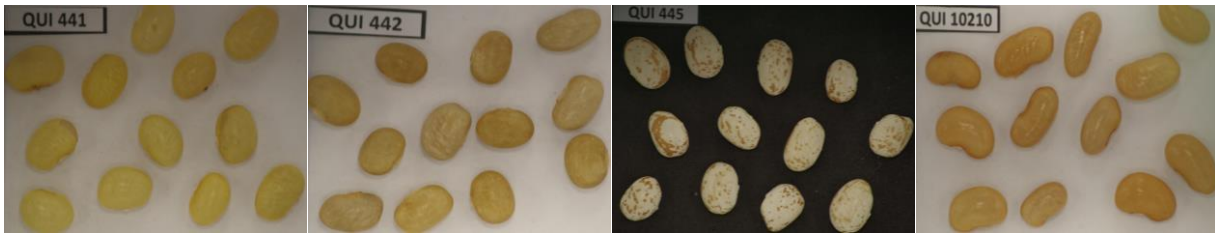

“Tortola”

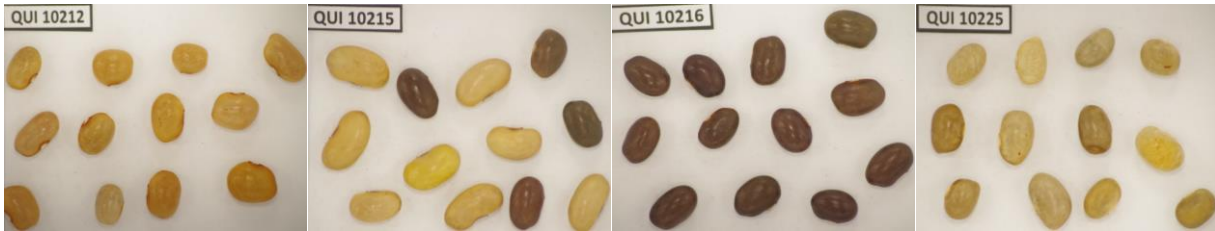

“Rancaguino”

“Burritos”

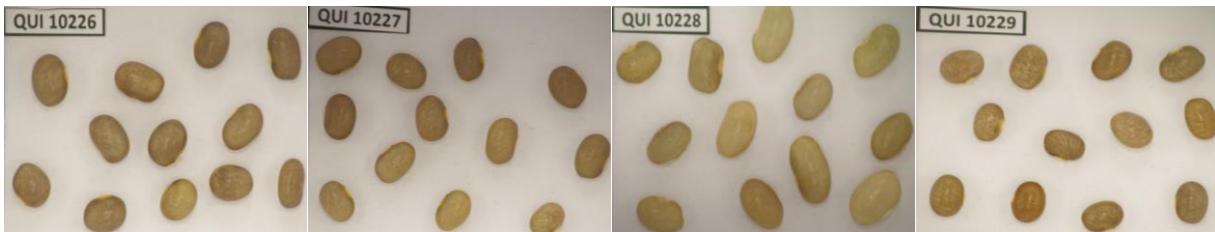

“Plomo”

“Plomo 100 Dias”

“Burros Antiguos”

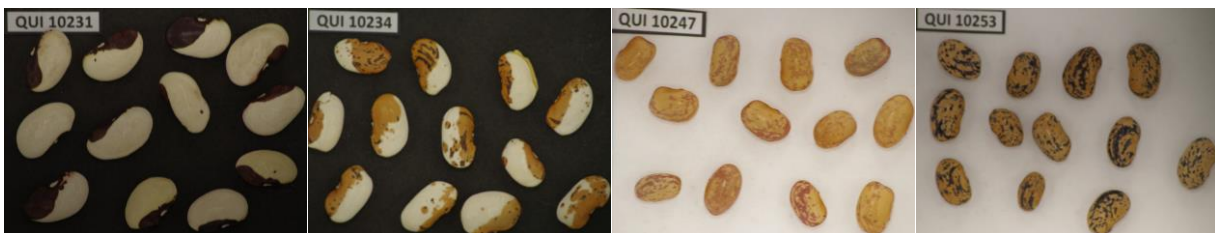

“Ojo Negro”

“Gato”

“Frutilla”

“Chilotito”

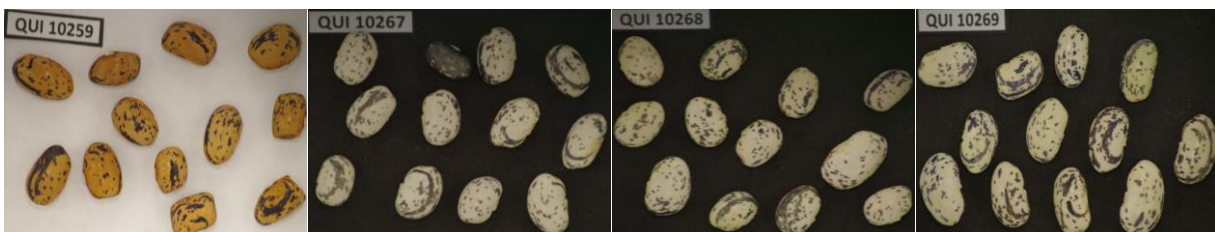

“Sapito”

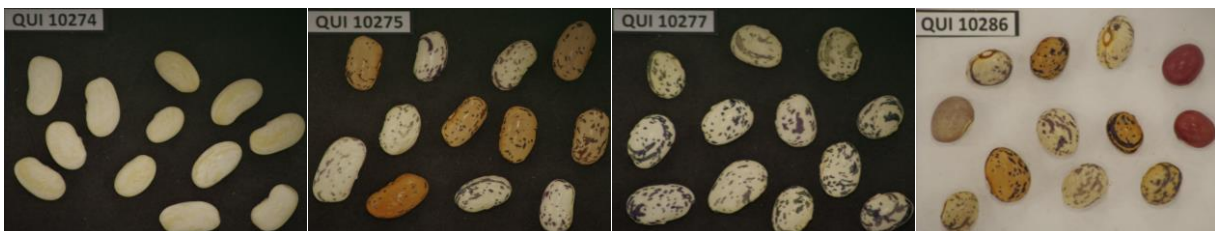

“Sapito”

“Sapo”

“Sapito”

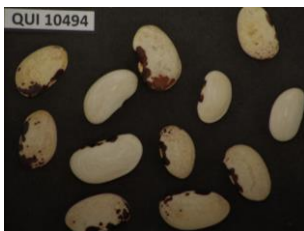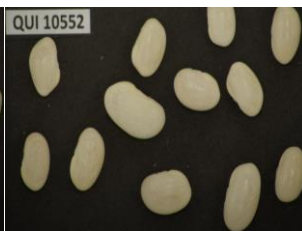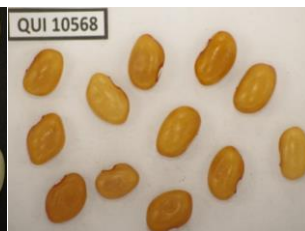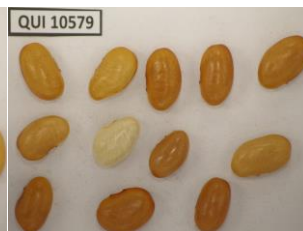

“Cabrito”

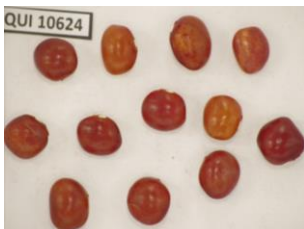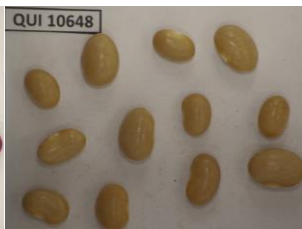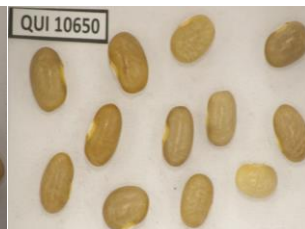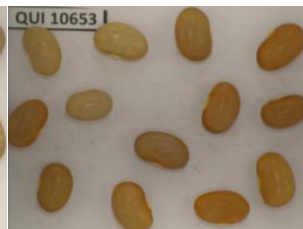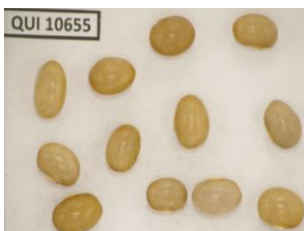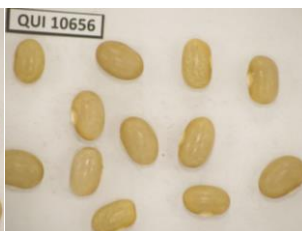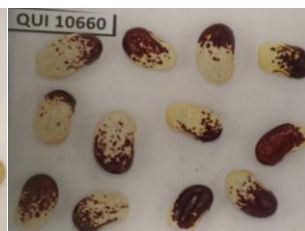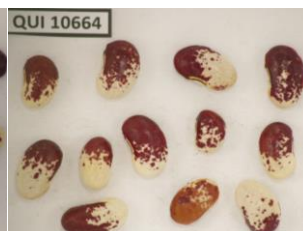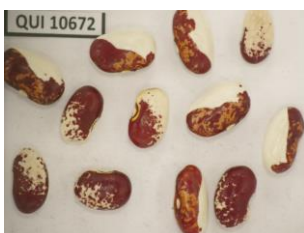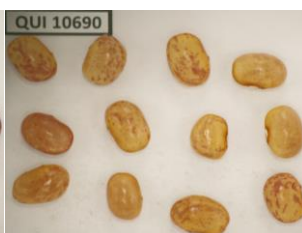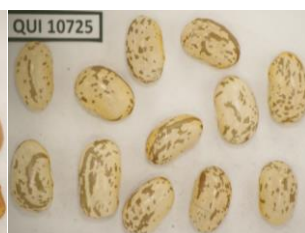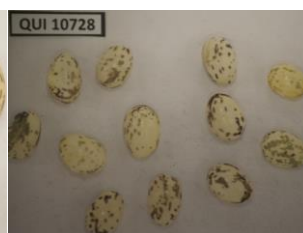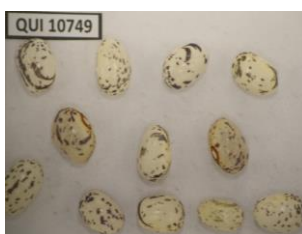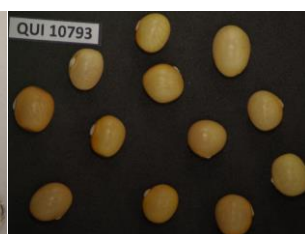

Supplement: s1 [file s1]
